# Supplementary material for: Human Multilineage 3D Spheroids as a Model of Liver Steatosis and Fibrosis
Source: PubMed Central journal article supplement (PMC6480107; doi:10.3390/ijms20071629), 2019-04-02
Supplement: ijms-20-01629-s001.pdf [file ijms-20-01629-s001.pdf]

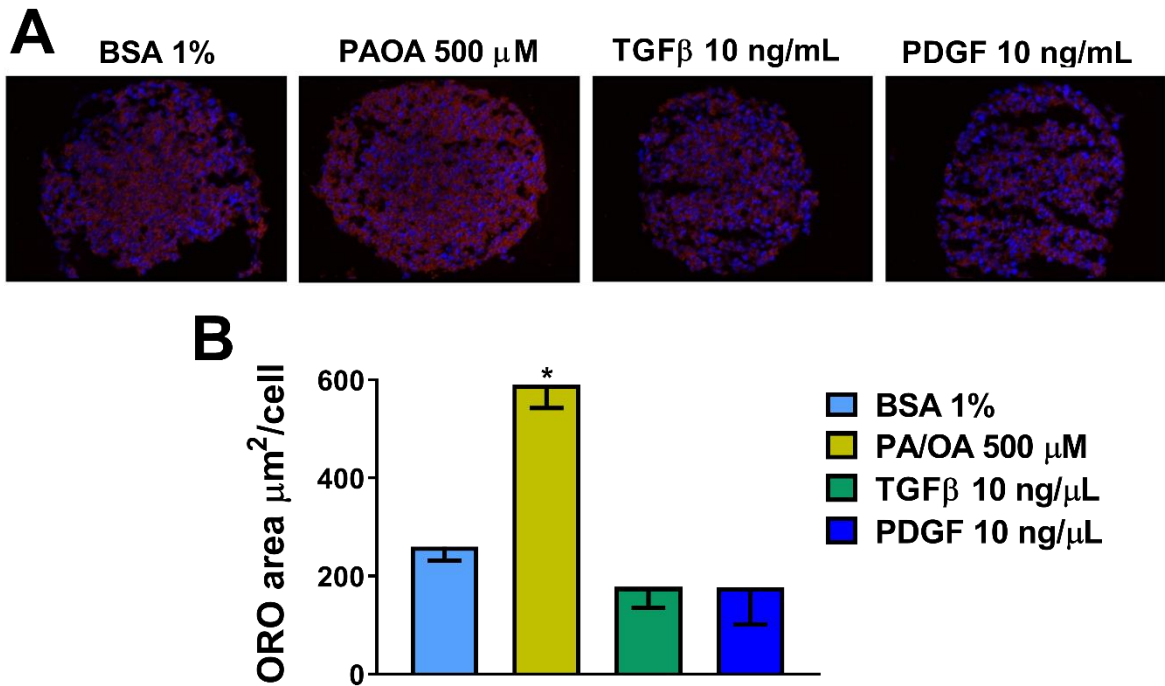

**Supplementary Figure 1: Treatment with fatty acids (PAOA) increases neutral fat content in 3D multilineage spheroids. (A)** Intracellular neutral lipid content visualized by ORO staining in sections (8  $\mu\text{m}$ ) of 3D spheroids HepG2/LX-2 ratio 24:1 treated, after 48 hours from the seeding with BSA 1%, a mix of palmitic acid and oleic acid (PAOA) 500  $\mu\text{M}$  (1:2), TGF- $\beta$  10 ng/mL or PDGF 10 ng/mL for 48 hours. Cell nuclei were stained with DAPI. **(B)** Quantification of intracellular ORO-stained area quantified by ImageJ software (n=4). P-value was calculated by Mann-Whitney non-parametric test, (\*  $p < 0.05$  vs BSA 1%). BSA: bovine serum albumin; PAOA: palmitic acid/oleic acid; TGF- $\beta$ : Transforming growth factor  $\beta$ ; PDGF: Platelet-derived growth factor; ORO: oil red O staining.
